# Supplementary material
Source: PubMed Central journal article supplement (PMC4883214)
Supplement: 40801_2015_32_MOESM1_ESM.pdf [file 40801_2015_32_MOESM1_ESM.pdf]

## Appendix: Study Questionnaire

| <b>Pharmacoepidemiologic Assessment of Medication Errors and Adverse Drug Reactions among patients in Uganda</b>                                                                                                             |                                                                                                                                                                                                                                                                                   |
|------------------------------------------------------------------------------------------------------------------------------------------------------------------------------------------------------------------------------|-----------------------------------------------------------------------------------------------------------------------------------------------------------------------------------------------------------------------------------------------------------------------------------|
| Investigator: _____ District: _____                                                                                                                                                                                          |                                                                                                                                                                                                                                                                                   |
| An <b>Adverse Drug Reaction</b> (ADR) is <u>any</u> response to a drug which is harmful and unintended, and which occurs at doses normally used by patients.                                                                 |                                                                                                                                                                                                                                                                                   |
| <b>HEALTH FACILITY CHARACTERISTICS</b>                                                                                                                                                                                       |                                                                                                                                                                                                                                                                                   |
| <b>1. Type of health facility</b> ( <i>Tick one only</i> )<br><br>[1] Public<br><br>[2] Private <u>Not-for-Profit</u><br><br>[3] Private <u>For-Profit</u>                                                                   | <b>2. Level of health facility</b> ( <i>Tick one only</i> )<br><br>[1] National Referral      [5] Health Centre III<br><br>[2] Regional Referral      [6] Health Centre II<br><br>[3] District Hospital      [7] Private Hospital<br><br>[4] Health Centre IV      [8] Other..... |
| <b>SOCIO-DEMOGRAPHIC CHARACTERISTICS OF PARTICIPANT</b>                                                                                                                                                                      |                                                                                                                                                                                                                                                                                   |
| <b>3. Gender</b><br><br>[1] Male<br><br>[2] Female                                                                                                                                                                           | <b>4. How old are you (in complete years)?</b> .....                                                                                                                                                                                                                              |
| <b>PROFESSIONAL CHARACTERISTICS OF PARTICIPANT</b>                                                                                                                                                                           |                                                                                                                                                                                                                                                                                   |
| <b>5. In which sector(s) do you practice?</b> ( <i>Tick all that apply</i> )<br><br>[1] Public health facility<br><br>[2] Private <u>Not-for-Profit</u> health facility<br><br>[3] Private <u>For-Profit</u> health facility | <b>6. In which department are you?</b> ( <i>Tick one only</i> )<br><br>[1] Medicine<br><br>[2] Surgery<br><br>[3] Paediatrics<br><br>[4] Obstetrics & Gynaecology<br><br>[5] Dentistry<br><br>[6] Pharmacy<br><br>[7] Other (Specify).....                                        |
| <b>7. What is the approximate number of patients you see per day?</b> .....                                                                                                                                                  | <b>8. For how long have you been working in this health facility?</b> ..... Months (If less than 1 year)<br>..... Completed Years                                                                                                                                                 |
| <b>9. What is your highest academic qualification?</b> ( <i>Tick one only</i> )<br><br>[1] Certificate<br><br>[2] Diploma<br><br>[3] First Degree<br><br>[4] Masters Degree<br><br>[5] PhD                                   | <b>10. For how long have you been practicing since you qualified with your highest academic training?</b><br><br>..... Months (If less than 1 year)<br>..... Completed Years                                                                                                      |
| <b>11. Do you teach medical students?</b><br><br>[1] Yes      [2] No (If no, go to 13)                                                                                                                                       | <b>12. If yes, duration of practice in a teaching hospital</b><br>..... Months (If less than 1 year)<br>..... Completed Years                                                                                                                                                     |

|                                                                                                                                                                                                                                                                                                                                                                                                                                                                       |                                                                                                                                                                                                                                                                                                           |
|-----------------------------------------------------------------------------------------------------------------------------------------------------------------------------------------------------------------------------------------------------------------------------------------------------------------------------------------------------------------------------------------------------------------------------------------------------------------------|-----------------------------------------------------------------------------------------------------------------------------------------------------------------------------------------------------------------------------------------------------------------------------------------------------------|
| <p><b>13. Are you actively involved in medical research?</b></p> <p>[1] Yes [2] No</p>                                                                                                                                                                                                                                                                                                                                                                                | <p><b>14. Professional Cadre</b> (<i>Tick one only</i>)</p> <p>[1] Doctor (<b>go to 15</b>)</p> <p>[2] Pharmacist (<b>go to 22</b>)</p> <p>[3] Nurse (<b>go to 19</b>)</p> <p>[4] Clinical officer (<b>go to 23</b>)</p> <p>[5] Pharmacy Technician (<b>go to 22</b>)</p> <p>[6] Other (Specify).....</p> |
| <p><b>15. Position/Level of Doctor</b> (<i>Tick one only</i>)</p> <p>[1] Senior Consultant</p> <p>[2] Consultant</p> <p>[3] Medical Officer Special Grade</p> <p>[4] Medical Officer</p> <p>[5] Senior House Officer</p> <p>[6] Intern Doctor</p> <p>[7] Other (specify).....</p>                                                                                                                                                                                     | <p><b>16. For how long have you been prescribing?</b></p> <p>..... Months (If less than 1 year)</p> <p>..... Completed Years</p>                                                                                                                                                                          |
| <p><b>17. What is the approximate number of prescriptions you write per day?</b>.....</p>                                                                                                                                                                                                                                                                                                                                                                             | <p><b>18. Have you given verbal prescriptions/orders to the attending nurse in the past 12 months?</b></p> <p>[1] Yes [2] No</p> <p style="text-align: right;"><i>(Skip to 23)</i></p>                                                                                                                    |
| <p><b>19. Which of the following cadre category describes your qualification?</b> (<i>Tick one only</i>)</p> <p>[1] Enrolled Midwife</p> <p>[2] Enrolled Nurse</p> <p>[3] Enrolled Mental Health Nurse</p> <p>[4] Enrolled Comprehensive Nurse</p> <p>[5] Registered Midwife</p> <p>[6] Registered Nurse</p> <p>[7] Registered Nurse/Midwife</p> <p>[8] Registered Mental Health Nurse</p> <p>[9] Registered Comprehensive Nurse</p> <p>[10] Other (specify).....</p> | <p><b>20. In some health facilities, nurses usually write out (transcribe) drug prescriptions from patients' medical records to medication charts. Are you required to transcribe prescriptions in your health facility?</b></p> <p>[1] Yes [2] No</p>                                                    |
| <p><b>21. In practice, do you regularly transcribe prescriptions?</b></p> <p>[1] Yes [2] No</p> <p style="text-align: right;"><i>(Skip to 23)</i></p>                                                                                                                                                                                                                                                                                                                 | <p><b>22. If pharmacist or pharmacy technician, area of practice</b> (<i>Tick all that apply</i>)</p> <p>[1] Hospital [3] Academia</p> <p>[2] Industry [4] Community/Private</p>                                                                                                                          |
| <p><b>SUSPECTED ADVERSE DRUG REACTION (ADR) REPORTING PROGRAM</b></p>                                                                                                                                                                                                                                                                                                                                                                                                 |                                                                                                                                                                                                                                                                                                           |
| <p><b>23. Have you received any complaint of adverse drug reactions (ADRs) from patients in the last 4 weeks?</b></p> <p>[1] Yes [2] No (If no, <b>go to 25</b>)</p>                                                                                                                                                                                                                                                                                                  | <p><b>24. If yes, how many complaints of ADRs have you received in the last 4 weeks? .....</b></p>                                                                                                                                                                                                        |

|                                                                                                                                                                                                                                                                                                                                                         |                                                                                                                                                                                                                                                                                |            |            |         |         |                                                                                                                                                                                                                                                                                                                                                                                                               |
|---------------------------------------------------------------------------------------------------------------------------------------------------------------------------------------------------------------------------------------------------------------------------------------------------------------------------------------------------------|--------------------------------------------------------------------------------------------------------------------------------------------------------------------------------------------------------------------------------------------------------------------------------|------------|------------|---------|---------|---------------------------------------------------------------------------------------------------------------------------------------------------------------------------------------------------------------------------------------------------------------------------------------------------------------------------------------------------------------------------------------------------------------|
| <p><b>25. Have you suspected an ADR in the last 4 weeks?</b></p> <p>[1] Yes      [2] No (If no, go to 28)</p>                                                                                                                                                                                                                                           | <p><b>26. If yes, how many ADRs have you suspected in the last 4 weeks? .....</b></p>                                                                                                                                                                                          |            |            |         |         |                                                                                                                                                                                                                                                                                                                                                                                                               |
| <p><b>27. Briefly describe the most recent suspected ADR you encountered providing information on patient age, drug involved &amp; route of administration, outcome of ADR &amp; its severity (mild, moderate, severe); e.t.c.</b></p> <p>.....</p> <p>.....</p> <p>.....</p> <p>.....</p>                                                              |                                                                                                                                                                                                                                                                                |            |            |         |         |                                                                                                                                                                                                                                                                                                                                                                                                               |
| <p><b>28. Have you ever encountered a fatal ADR that might have led to a patient's death?</b></p> <p>[1] Yes      [2] No</p>                                                                                                                                                                                                                            | <p><b>29. Have you reported any suspected ADR in the last 12 months?</b></p> <p>[1] Yes      [2] No (If No, go to 35)</p>                                                                                                                                                      |            |            |         |         |                                                                                                                                                                                                                                                                                                                                                                                                               |
| <p><b>30. If yes, please indicate the period within which you reported the most recent suspected ADR</b></p> <p>[1]              [2]              [3]              [4]              [5]</p> <table border="1" data-bbox="145 792 754 869"> <tr> <td>4 weeks</td> <td>5-8 weeks</td> <td>9-12 weeks</td> <td>4-6 mo</td> <td>7-12 mo</td> </tr> </table> | 4 weeks                                                                                                                                                                                                                                                                        | 5-8 weeks  | 9-12 weeks | 4-6 mo  | 7-12 mo | <p><b>31. To which authorities did you report the most recent of these ADRs?</b><br/>(Tick all that apply)</p> <p>[1] National Drug Authority (NDA)</p> <p>[2] AIDS Treatment Information Centre (ATIC)</p> <p>[3] Drug Manufacturer</p> <p>[4] Medical Superintendent</p> <p>[5] District Director of Health Services (DDHS)</p> <p>[6] Institutional Review Board (IRB)</p> <p>[7] Other (specify).....</p> |
| 4 weeks                                                                                                                                                                                                                                                                                                                                                 | 5-8 weeks                                                                                                                                                                                                                                                                      | 9-12 weeks | 4-6 mo     | 7-12 mo |         |                                                                                                                                                                                                                                                                                                                                                                                                               |
| <p><b>32. What motivated you to report the suspected ADR?</b></p> <p>.....</p> <p>.....</p> <p>.....</p>                                                                                                                                                                                                                                                | <p><b>33. Did you get any feedback about the ADR report(s) you submitted?</b></p> <p>[1] Yes      [2] No</p>                                                                                                                                                                   |            |            |         |         |                                                                                                                                                                                                                                                                                                                                                                                                               |
| <p><b>34. Have you reported an ADR to the National Drug Authority in the past 12 months?</b></p> <p>[1] Yes      [2] No</p>                                                                                                                                                                                                                             | <p><b>35. Have you wanted to report an ADR in the past 12 months but did not have the ADR report form?</b></p> <p>[1] Yes      [2] No</p>                                                                                                                                      |            |            |         |         |                                                                                                                                                                                                                                                                                                                                                                                                               |
| <p><b>36. Have you had an ADR suspicion in the past 12 months but did not fill the ADR report form even when you had it?</b></p> <p>[1] Yes      [2] No</p>                                                                                                                                                                                             | <p><b>37. Did you ever fill the ADR report form but failed to send it for any reason?</b></p> <p>[1] Yes      [2] No (If no, go to 39)</p>                                                                                                                                     |            |            |         |         |                                                                                                                                                                                                                                                                                                                                                                                                               |
| <p><b>38. If yes, what was the reason(s) that you did not send the form on the most recent occasion?</b></p> <p>.....</p> <p>.....</p> <p>.....</p>                                                                                                                                                                                                     | <p><b>39. Which of the following health workers are qualified to report adverse drug reactions? (Tick all that apply)</b></p> <p>[1] Medical doctors              [4] Pharmacists</p> <p>[2] Dentists                              [5] Clinical Officers</p> <p>[3] Nurses</p> |            |            |         |         |                                                                                                                                                                                                                                                                                                                                                                                                               |

|                                                                                                                                                                                                                                                                                                                                                              |                                                                                                                                                                                                                                                                                                                                                                                        |
|--------------------------------------------------------------------------------------------------------------------------------------------------------------------------------------------------------------------------------------------------------------------------------------------------------------------------------------------------------------|----------------------------------------------------------------------------------------------------------------------------------------------------------------------------------------------------------------------------------------------------------------------------------------------------------------------------------------------------------------------------------------|
| <p><b>40. Pharmacovigilance relates to a reporting system for adverse effects of medicines. Have you ever heard about Pharmacovigilance?</b><br/>         [1] Yes [2] No (If no, go to 42)</p>                                                                                                                                                               | <p><b>41. If yes, please state the source(s) of your information</b><br/>         (Tick all that apply)<br/>         [1] Books/Journals<br/>         [2] Internet/e-communication<br/>         [3] Trainings/Seminars/courses attended<br/>         [4] Television<br/>         [5] Outdoor adverts<br/>         [6] Professional colleague<br/>         [7] Others (Specify).....</p> |
| <p><b>42. Are you aware of the existence of a National Pharmacovigilance Centre (NPC) in Uganda?</b><br/>         [1] Yes [2] No (If no, go to 44)</p>                                                                                                                                                                                                       | <p><b>43. If yes, do you know where the NPC office is located?</b><br/>         [1] Yes [2] No</p>                                                                                                                                                                                                                                                                                     |
| <p><b>44. Have you ever seen the ADR form used for reporting ADRs to the NPC?</b><br/>         [1] Yes [2] No (If no, go to 48)</p>                                                                                                                                                                                                                          | <p><b>45. If yes, have you ever filled out the NPC ADR form?</b><br/>         [1] Yes [2] No (If no, go to 47)</p>                                                                                                                                                                                                                                                                     |
| <p><b>46. Was the information on the NPC ADR form clear to you about what to report?</b><br/>         [1] Yes [2] No</p>                                                                                                                                                                                                                                     | <p><b>47. Have you ever filled out any ADR form different from that of the NPC?</b><br/>         [1] Yes [2] No</p>                                                                                                                                                                                                                                                                    |
| <p><b>48. Have you ever submitted an ADR report to the NPC?</b><br/>         [1] Yes [2] No</p>                                                                                                                                                                                                                                                              | <p><b>49. Do you know where to obtain the NPC ADR forms in this health facility?</b><br/>         [1] Yes [2] No</p>                                                                                                                                                                                                                                                                   |
| <p><b>50. Do you know to whom to report ADRs in your health facility?</b><br/>         [1] Yes [2] No (If no, go to 52)</p>                                                                                                                                                                                                                                  | <p><b>51. If yes, please specify in your health facility to whom you would report an ADR if you had to?</b><br/>         .....<br/>         .....</p>                                                                                                                                                                                                                                  |
| <p><b>52. An ADR reporting system should;</b> (Tick all that apply)<br/>         [1] be compulsory<br/>         [2] be voluntary<br/>         [3] provide financial incentives to the reporter<br/>         [4] hide the identity of the prescriber<br/>         [5] hide the identity of the reporter<br/>         [6] hide the identity of the patient</p> | <p><b>53. Have you ever been trained on how to report ADRs with the ADR form?</b><br/>         [1] Yes [2] No</p>                                                                                                                                                                                                                                                                      |
| <p><b>54. Please suggest possible ways of improving ADR reporting</b><br/>         .....<br/>         .....<br/>         .....<br/>         .....</p>                                                                                                                                                                                                        |                                                                                                                                                                                                                                                                                                                                                                                        |

**Instructions**

In the left column are questions that will be the subject of your evaluation and in the right column is a gradual scale where you should mark with **X** the place along the scale where, according to your opinion, represents your degree of agreement with the text comment. The **extreme left** side indicates **total disagreement** while the **extreme right** indicates **total agreement**. Agreement increases as you move across from left to right

Please indicate whether you agree or disagree with the following statements

(1 = Strongly disagree; 2 = Slightly disagree; 3 = Neutral; 4 = Slightly agree; 5 = Strongly agree)

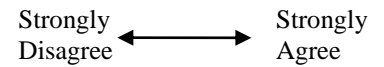

|    | Statement                                                                                                                | 1 | 2 | 3 | 4 | 5 |
|----|--------------------------------------------------------------------------------------------------------------------------|---|---|---|---|---|
| 55 | Serious ADRs are well documented by the time a drug is marketed                                                          |   |   |   |   |   |
| 56 | It is nearly impossible to determine whether a drug is responsible for a particular adverse reaction                     |   |   |   |   |   |
| 57 | I would only report an ADR if I was sure that it was related to the use of a particular drug                             |   |   |   |   |   |
| 58 | The one case of an ADR that an individual health worker might see makes no significant contribution to medical knowledge |   |   |   |   |   |
| 59 | I read articles about adverse drug reactions with interest                                                               |   |   |   |   |   |
| 60 | I have a professional obligation to report ADRs                                                                          |   |   |   |   |   |
| 61 | Reporting ADRs puts my career at risk                                                                                    |   |   |   |   |   |
| 62 | It is only necessary to report serious or unexpected ADRs                                                                |   |   |   |   |   |
| 63 | I do not have time to complete an ADR report form                                                                        |   |   |   |   |   |
| 64 | I do not have the time to actively look for ADRs while at work                                                           |   |   |   |   |   |
| 65 | I do not know how information reported in ADR form is used                                                               |   |   |   |   |   |
| 66 | I talk with pharmaceutical companies about possible ADRs with their drugs                                                |   |   |   |   |   |
| 67 | I think that the best way to report ADRs is by publishing in medical literature                                          |   |   |   |   |   |
| 68 | I should be financially reimbursed for providing the ADR service                                                         |   |   |   |   |   |
| 69 | I would be more likely to report ADRs if there were an easier method                                                     |   |   |   |   |   |

**Part B: Medication Error Reporting System (MERS)**

|                                                                                                                                                                                                    |                                                                                                                                |
|----------------------------------------------------------------------------------------------------------------------------------------------------------------------------------------------------|--------------------------------------------------------------------------------------------------------------------------------|
| A <b>Medication Error</b> (ME) is defined as any error in the process of prescribing, dispensing, or administration of medication irrespective of whether such error leads to patient harm or not. |                                                                                                                                |
| <b>70. Do you think we should have a national system for reporting Medication Errors (MEs)?</b><br>[1] Yes      [2] No                                                                             | <b>71. The Medication Error Reporting System should;</b><br>[1] be integrated with the ADR reporting system<br>[2] stand alone |
| <b>72. Reporting of Medication Errors should be;</b><br>[1] Mandatory                      [2] Voluntary                                                                                           | <b>73. Should medication error reporting relate only to fatal adverse events?</b><br>[1] Yes      [2] No                       |
| <b>74. Should patients participate in the reporting of MEs?</b> [1] Yes      [2] No                                                                                                                |                                                                                                                                |

**Instructions**

In the left column are questions that will be the subject of your evaluation and in the right column is a gradual scale where you should mark with **X** the place along the scale where, according to your opinion, represents your degree of agreement with the text comment. The **extreme left** side indicates **total disagreement** while the **extreme right** indicates **total agreement**. Agreement increases as you move across from left to right

Please indicate whether you agree or disagree with the following statements

(1 = Strongly disagree; 2 = Slightly disagree; 3 = Neutral; 4 = Slightly agree; 5 = Strongly agree)

|    |                                                                                                        | Strongly Disagree ←————→ Strongly Agree |   |   |   |   |
|----|--------------------------------------------------------------------------------------------------------|-----------------------------------------|---|---|---|---|
|    | Statement                                                                                              | 1                                       | 2 | 3 | 4 | 5 |
| 75 | Reported MEs should be used to find the root causes of the MEs                                         |                                         |   |   |   |   |
| 76 | I would recommend a non-disciplinary approach to reporting to encourage health workers to report MEs   |                                         |   |   |   |   |
| 77 | There is lack of time for reporting MEs                                                                |                                         |   |   |   |   |
| 78 | There is a culture of blame within healthcare                                                          |                                         |   |   |   |   |
| 79 | There is need for organizational leadership and support in reporting MEs                               |                                         |   |   |   |   |
| 80 | Personal details of the person who made an error are required to be reported                           |                                         |   |   |   |   |
| 81 | The system should report both actual and potential MEs                                                 |                                         |   |   |   |   |
| 82 | Medication errors are handled appropriately in this setting                                            |                                         |   |   |   |   |
| 83 | The culture in this health facility makes it easy to learn from the MEs of others                      |                                         |   |   |   |   |
| 84 | I am more likely to make MEs in tense or hostile situations                                            |                                         |   |   |   |   |
| 85 | I have seen others make MEs that had the potential to harm patients                                    |                                         |   |   |   |   |
| 86 | Disruptions in continuity of patient care, such as shift changes, can be detrimental to patient safety |                                         |   |   |   |   |
| 87 | I have made MEs that had the potential to harm patients                                                |                                         |   |   |   |   |
| 88 | Important issues are well communicated at shift changes                                                |                                         |   |   |   |   |
| 89 | I may hesitate to use a reporting system for MEs because I am concerned about being identified         |                                         |   |   |   |   |
| 90 | I should be financially rewarded for reporting MEs                                                     |                                         |   |   |   |   |
| 91 | Minor medication errors should not be reported                                                         |                                         |   |   |   |   |
